# Supplementary material
Source: publisher site journal article supplement (https://www.dovepress.com/article/175484)
Supplement: Supplementary file 1 [file get_supplementary_file.php]

**Table S1** FQD constituent database

| No. | Compound                                                                                                                                                                                                                                                                                                               |
|-----|------------------------------------------------------------------------------------------------------------------------------------------------------------------------------------------------------------------------------------------------------------------------------------------------------------------------|
| 1   | (-)-alpha-Pinene                                                                                                                                                                                                                                                                                                       |
| 2   | ()-Aromadendrene                                                                                                                                                                                                                                                                                                       |
| 3   | (-)-nopinene                                                                                                                                                                                                                                                                                                           |
| 4   | (-)-spathulenol                                                                                                                                                                                                                                                                                                        |
| 5   | ()-Terpinen-4-ol                                                                                                                                                                                                                                                                                                       |
| 6   | (+)-alpha-funebrene                                                                                                                                                                                                                                                                                                    |
| 7   | (+)-beta-phellandrene                                                                                                                                                                                                                                                                                                  |
| 8   | (+)-maalioxide                                                                                                                                                                                                                                                                                                         |
| 9   | (1R,4E,7E,11R)-1,5,9,9-tetramethyl-12-oxabicyclo[9.1.0]dodeca-4,7-diene                                                                                                                                                                                                                                                |
| 10  | (1R,4S,4aR,8aR)-4-isopropyl-1,6-dimethyl-3,4,4a,7,8,8a-hexahydro-2H-naphthalen-1-ol                                                                                                                                                                                                                                    |
| 11  | (1R,4S,5R)-4-isopropenyl-1,8-dimethylspiro[4.5]dec-8-ene                                                                                                                                                                                                                                                               |
| 12  | (1R,5R,7S)-4,7-dimethyl-7-(4-methylpent-3-enyl)bicyclo[3.1.1]hept-3-ene                                                                                                                                                                                                                                                |
| 13  | (1S,4E,8E,10R)-4,8,11,11-tetramethylbicyclo[8.1.0]undeca-4,8-diene                                                                                                                                                                                                                                                     |
| 14  | (1S,4R,5R)-1-isopropyl-4-methyl-4-bicyclo[3.1.0]hexanol                                                                                                                                                                                                                                                                |
| 15  | (1S,5S)-1-isopropyl-4-methylenebicyclo[3.1.0]hexane                                                                                                                                                                                                                                                                    |
| 16  | (1S,5S)-7,7-dimethyl-2-methylenebicyclo[3.1.1]hept-3-ene                                                                                                                                                                                                                                                               |
| 17  | (2-amyphenyl)methanol                                                                                                                                                                                                                                                                                                  |
| 18  | (2R,3S,4S,5R,6R)-2-(hydroxymethyl)-6-[[[(3S,5R,8R,9R,10R,12R,13R,14R,17S)-12-hydroxy-4,4,8,10,14-pentamethyl-17-[(2Z)-6-methylhepta-2,5-dien-2-yl]-2,3,5,6,7,9,11,12,13,15,16,17-dodecahydro-1H-cyclopenta[a]phenanthren-3-yl]oxy]oxane-3,4,5-triol                                                                    |
| 19  | (2R,4aR)-2-isopropenyl-4a,8-dimethyl-2,3,4,5,6,7-hexahydro-1H-naphthalene                                                                                                                                                                                                                                              |
| 20  | (2S,3R,4S,5S,6R)-2-[(2S)-2-[(3S,5R,8R,9R,10R,12R,13R,14R,17S)-3-[(2R,3R,4S,5S,6R)-4,5-dihydroxy-6-(hydroxymethyl)-3-[(2S,3R,4S,5S,6R)-3,4,5-trihydroxy-6-(hydroxymethyl)oxan-2-yl]oxyoxan-2-yl]oxy-12-hydroxy-4,4,8,10,14-pentamethyl-2,3,5,6,7,9,11,12,13,15,16,17-dodecahydro-1H-cyclopenta[a]phenanthrene-3,12-diol |
| 21  | (3R,5R,8R,9R,10R,12R,13R,14R,17S)-17-[(2S)-2-hydroxy-6-methylhept-5-en-2-yl]-4,4,8,10,14-pentamethyl-2,3,5,6,7,9,11,12,13,15,16,17-dodecahydro-1H-cyclopenta[a]phenanthrene-3,6,12-triol                                                                                                                               |
| 22  | (3S,5R,6S,8R,9R,10R,12R,13R,14R,17S)-17-[(2R)-2-hydroxy-6-methylhept-5-en-2-yl]-4,4,8,10,14-pentamethyl-2,3,5,6,7,9,11,12,13,15,16,17-dodecahydro-1H-cyclopenta[a]phenanthrene-3,6,12-triol                                                                                                                            |
| 23  | (3S,5R,6S,8R,9R,10R,12R,13R,14R,17S)-17-[(2S)-2-hydroxy-6-methylhept-5-en-2-yl]-4,4,8,10,14-pentamethyl-2,3,5,6,7,9,11,12,13,15,16,17-dodecahydro-1H-cyclopenta[a]phenanthrene-3,6,12-triol                                                                                                                            |
| 24  | (3S,5R,8R,9R,10R,12R,13R,14R,17S)-17-[(2S)-2-hydroxy-6-methylhept-5-en-2-yl]-4,4,8,10,14-pentamethyl-2,3,5,6,7,9,11,12,13,15,16,17-dodecahydro-1H-cyclopenta[a]phenanthrene-3,12-diol                                                                                                                                  |
| 25  | (3Z,6S,7R)-3-butylidene-6-butyryl-7-hydroxy-4,5,6,7-tetrahydroisobenzofuran-1-one                                                                                                                                                                                                                                      |
| 26  | (3Z,6S,7S)-3-butylidene-6,7-dihydroxy-4,5,6,7-tetrahydroisobenzofuran-1-one                                                                                                                                                                                                                                            |
| 27  | (4aS,6aR,6aS,6bR,8aR,10S,12aR,14bR)-10-hydroxy-2,2,6a,6b,9,9,12a-heptamethyl-1,3,4,5,6,6a,7,8,8a,10,11,12,13,14b-tetradecahydronicene-4a-carboxylic acid                                                                                                                                                               |
| 28  | (4aS,7S,8aR)-7-isopropenyl-4a-methyl-1-methylenedecalin                                                                                                                                                                                                                                                                |
| 29  | (4S)-4-isopropylcyclohexene-1-carbaldehyde                                                                                                                                                                                                                                                                             |

- 30 (4S,6S)-cis-carveol
- 31 (5S,6R)-5,6-dimethyltetrahydropyran-2-one
- 32 (6R)-6-butylcyclohepta-1,4-diene
- 33 (E,E)-1,3,5-undecatriene
- 34 (L)-alpha-terpineol
- 35 (R)-(-)-alpha-phellandrene
- 36 (R)-(-)-citronellal
- 37 (R)-canadine
- 38 (R)-linalool
- 39 (R)-p-Menth-1-en-4-ol
- 40 (S)-(+)-alpha-phellandrene
- 41 (S)-2,2,3-trimethylcyclopent-3-ene-1-acetaldehyde
- 42 (Z)-2-methyl-5-[(1S,2R,4R)-2-methyl-3-methylene-2-norbornanyl]pent-2-en-1-ol
- 43 (Z)-ligustilide
- 44 (Z,Z)-alpha-farnesene
- 45 .gamma.-bisabolene
- 46 [(3S,4R,5R)-5-[[[(2R,3S,4S,5R,6S)-6-(2-acetyl-5-methoxyphenoxy)-3,4,5-trihydroxyoxan-2-yl]methoxy]-3,4-dihydroxyoxolan-3-yl]methyl 3,4,5-trihydroxybenzoate
- 47 1(3H)-Isobenzofuranone, 3-butyl-3a,4,5,6-tetrahydro-, cis-(-)-
- 48 1,1-diethoxybutane
- 49 1,2,3,4,4a,7-hexahydro-1,6-dimethyl-4-(1-methylethyl)-naphthalene
- 50 1,3,8-p-menthatriene
- 51 1,5,5-trimethyl-6-methylenecyclohexene
- 52 1,8-cineole
- 53 12-O-nicotinoylisolineolone
- 54 13-tetradecenyl acetate
- 55 16-oxoseratenediol
- 56 1-acetyl-beta-carboline
- 57 1-beta-ethylacrylate-7-aldehyde-beta-carboline
- 58 1H-cycloprop(e)azulen-7-ol, decahydro-1,1,7-trimethyl-4-methylene-, (1aR-(1aalpha,4aalpha,7beta,7beta,7balpha))-
- 59 1-hexadecyne
- 60 1-octanol,2,7-dimethyl-
- 61 1-terpineol
- 62 2,2,3-trimethylcyclopent-3-ene-1-carboxaldehyde
- 63 2,3,4-trimethyldecane
- 64 2,3,8-trimethyldecane
- 65 2,6,10,15-tetramethylheptadecane
- 66 2,6-dimethyl-3,7-octadiene-2,6-diol
- 67 2,9-dimethyldecane
- 68 2-[(1R,3S,4S)-3-isopropenyl-4-methyl-4-vinylcyclohexyl]propan-2-ol
- 69 2-[(2S,5S,6S)-6,10-dimethylspiro[4.5]dec-9-en-2-yl]propan-2-ol
- 70 20(R)-ginsenoside Rg2
- 71 20(S)-ginsenoside-Rg2

72 20-(S)-ginsenoside-Rg3  
73 20-(S)-ginsenoside-Rg3\_qt<sup>a</sup>  
74 20(S)-ginsenoside-Rh1  
75 20(S)-ginsenoside-Rh1\_qt  
76 20(s)-protopanaxadiol  
77 20-hexadecanoylingenol  
78 2-carboxymethyl-3-prenyl-2,3-epoxy-1,4-naphthoquinone  
79 2-formylpyrrole  
80 2-methyl-1-phenylpropene  
81 2-methyl-5-(1-methylene)-1,3-cyclohexadiene  
82 2-methylbenzoxazol  
83 2-methyltridecane  
84 2-propionylfuran  
85 3(S)-3-butyl-4,5-dihydrophthalide  
86 3,4-dimethylheptane  
87 3,4-epoxy-2,2,7,7-tetramethyl-octane  
88 3,5-dimethyl-p-anisic acid  
89 3-[[[(2S)-2,4-dihydroxy-3,3-dimethylbutanoyl]amino]propanoic acid  
90 3691-11-0  
91 3-butylidene-7-hydroxyphthalide  
92 3-cyclohexen-1-ol  
93 3-Ethyl-3-methylheptane  
94 3-methylheptane  
95 3-methylundecane  
96 3-O-beta-D-glucuronopyranosyl gypsogenin  
97 3-O-beta-D-glucuronopyranosyl gypsogenin\_qt  
98 4,7-dihydroxy-3-butylphthalide  
99 49070\_FLUKA  
100 4-hydroxy-3-butylphthalide  
101 4-iodoindoline  
102 4-methyldodecane  
103 4-octanone  
104 5-[(3aS,6R,6aR)-2-keto-1,3,3a,4,6,6a-hexahydrothieno[3,4-d]imidazol-6-yl]valeric acid  
105 506-43-4  
106 58870\_FLUKA  
107 5-heptadec-12-enylresorcinol  
108 5-Isobutylnonane  
109 5-isopropyl-2-methylbicyclo[3.1.0]hex-2-ene  
110 5-methyl-tetradecane  
111 5-propyl-2-thiouracil  
112 6'-malonylginsenoside Rd1  
113 6'-malonylginsenoside Rd1\_qt<sup>1</sup>  
114 6-O-E-feruloylajugol  
115 6-O-E-feruloylajugol\_qt

116 7-(beta-xylosyl)cephalomannine  
117 7alpha-L-rhamnosyl-6-methoxylutcolin  
118 7-oxabicyclo-2.2.1-heptane,1-methyl-4-[1-methylethyl]-  
119 7-tetradecyne  
120 9-hexadecenoic acid  
121 acetal  
122 adenine  
123 adenosine triphosphate  
124 ADO  
125 alexandrin  
126 alexandrin\_qt  
127 alloaromadrene  
128 allocymene  
129 alpha-cubebene  
130 alpha-curcumene  
131 alpha-farnesene  
132 alpha-guttiferin  
133 alpha-humulene  
134 alpha-selinene  
135 amylbenzene  
136 APH  
137 aposiopolamine  
138 arachidonate  
139 araloside A  
140 argininy-fructosyl-glucose  
141 argininy-fructosyl-glucose\_qt  
142 aromadendrene oxide 2  
143 artemisia triene  
144 augustic-acid  
145 BDPH  
146 berberine  
147 berberrubine  
148 berlambine  
149 beta-asarone  
150 beta-bisabolene  
151 beta-caryophyllene  
152 beta-elemene  
153 beta-humulene  
154 beta-selinene  
155 beta-sitosterol  
156 beta-cubebene  
157 caffeic acid  
158 campesteryl ferulate  
159 carotol

160 cedrene  
161 celabenzine  
162 cerulignol  
163 CHEBI:7  
164 chrysanthemaxanthin  
165 chuanxiongol  
166 -cis-.beta.-Elemene diastereomer  
167 cis-ligustilide  
168 cis-Piperitol  
169 cis-Widdrol alpha-epoxide  
170 cnidilide  
171 columbamine  
172 coniferylcrulate  
173 corchoroside A  
174 corchoroside A\_qt  
175 corydaldine  
176 crysophanol  
177 CYCLODODECENE  
178 cyclohexane,1,1,2,3-tetramethyl-  
179 cymol  
180 dammarane  
181 darutoside  
182 dauricine (8CI)  
183 DBP  
184 D-camphene  
185 decahydro-1,6-bis(methylene)-4-(1-methylethyl)-naphthalene  
186 deoxyharringtonine  
187 D-erythro-Isocitric acid  
188 dianthramine  
189 dimethyl D-malate  
190 diop  
191 ditertbutyl phthalate  
192 dl-3n-butylphthalide  
193 DPEC  
194 EIC  
195 elemicin  
196 epiberberine  
197 epsilon-cadinene  
198 ethyl caffeate  
199 ethylpalmitate  
200 EUG  
201 exceparl M-ol  
202 FA  
203 fagarine

204 FER  
205 folinic acid  
206 frutinone A  
207 fumarine  
208 furol  
209 gamma-selinene  
210 gem-dimethylcyclopentane  
211 germacrene  
212 germacrene D  
213 ginsenoside La  
214 ginsenoside La\_qt  
215 ginsenoside Rb1  
216 ginsenoside Re  
217 ginsenoside rf  
218 ginsenoside Rg5  
219 ginsenoside Rg5\_qt  
220 ginsenoside rh2  
221 ginsenoside Ro  
222 ginsenoside Ro\_qt  
223 ginsenoside-Ra0  
224 ginsenoside-Ra1  
225 ginsenoside-Ra2  
226 ginsenoside-Ra3  
227 ginsenoside-Rb2  
228 ginsenoside-Rc  
229 ginsenoside-Rg3  
230 ginsenoside-Rg3\_qt  
231 ginsenoside-Rh1  
232 ginsenoside-Rh1\_qt  
233 ginsenoside-Rh3\_qt  
234 ginsenoside-Rh4  
235 ginsenoside-Rh4\_qt  
236 ginsenoside-Rs1  
237 ginsenoside-Rs2  
238 ginsenoyne A  
239 ginsenoyne B  
240 ginsenoyne C  
241 ginsenoyne D  
242 ginsenoyne E  
243 girinimbin  
244 gomisin B  
245 groenlandicine  
246 GUP  
247 gypenoside Ixix

248 gypnoside V Qt  
249 hepanal  
250 heptan  
251 heriguard  
252 hexanal  
253 hexaphenone  
254 inermin  
255 isobutyrophenone  
256 isoheptane  
257 isovanillin  
258 jatrorrizine  
259 javanicin  
260 kaempferol  
261 kaempferol-3-arabofuranoside  
262 L-adenosine  
263 L-bornyl acetate  
264 L-erythro-isocitric acid  
265 levistolid A  
266 levistolide-A  
267 limonin  
268 linoleic  
269 L-limonen  
270 loxanol V  
271 L-valyl-L-valinc-achydride  
272 magnoflorine  
273 magnograndiolide  
274 MAL  
275 malkangunin  
276 malonylginsenoside Rc  
277 malonylginsenoside Rc Qt  
278 malonylginsenoside Rd  
279 malonylginsenoside Rd Qt  
280 malvic acid  
281 mandenol  
282 MAV  
283 methyl (Z)-icos-11-enoate  
284 methyl 2-pentanoylbenzoate  
285 methyl 3-furoate  
286 methyl linoleate  
287 methyl margarate  
288 methyl myristate  
289 methyl palmitate  
290 methyl palmitelaidate  
291 methyl pentadecanoate

292 methyl stearate  
293 methyl tricosanoate  
294 methyleugenol  
295 methylselenocysteine  
296 m-ethyltoluene  
297 MLI  
298 moslene  
299 mycosinol  
300 myrcene  
301 myricanone  
302 MYS  
303 neocnidilide  
304 neoheptane  
305 nepetin  
306 N-heptadecanol  
307 NN-dimethyldecanamide  
308 nonacosanediol-6,8  
309 nonanal  
310 noroxyhydrastinine  
311 notoginsenoside R2  
312 notoginsenoside R2 Qt  
313 notoginsenoside R6  
314 N-Salicylidene-salicylamine  
315 O-acetyl-P-cresol  
316 obacunonic acid  
317 obacunone  
318 obamegine  
319 OCT  
320 octatriacontane  
321 O-cymol  
322 oleanane  
323 oleic acid  
324 OYA  
325 paeonol  
326 palmitine  
327 palmitin A  
328 palmitic acid  
329 panaxadiol  
330 panaxatriol  
331 panaxynol  
332 panaxytriol  
333 pancratistatin  
334 pandamine  
335 pangamic acid



336 p-cymen-8-ol  
337 pentadecylic acid  
338 pentylfuran  
339 perlolyrine  
340 p-glucosyloxymandelonitrile  
341 PHB  
342 phellodendrine  
343 pisol  
344 PLO  
345 p-ocimene  
346 psuedohypericin  
347 ramalic acid  
348 sanchinoside C1  
349 sedanoic-acid  
350 senkyunolide A  
351 senkyunolide G  
352 senkyunolide-C  
353 senkyunolide-D  
354 senkyunolide-E  
355 senkyunolide-F  
356 senkyunolide-J  
357 senkyunolide-K  
358 senkyunolide-L  
359 senkyunolide-N  
360 senkyunolide-P  
361 senkyunolide-Q  
362 senkyunolide-R  
363 senkyunolide-S  
364 senkyunone  
365 sinapic acid  
366 sitogluside  
367 sitosterol  
368 stearic acid  
369 stearyl acetate  
370 stigmasterol  
371 suchilactone  
372 sucrose  
373 suffruticoside A Qt  
374 TDA  
375 tereben  
376 terpilene  
377 tetradecane  
378 tetramethylpyrazine  
379 thymol

- 380 TML
- 381 trans-2-nonen-1-ol
- 382 trans-piperitol
- 383 trifolirhizin
- 384 trihydroxybufosterocholanic acid
- 385 undecane, 3,6-dimethyl
- 386 undekansaeure
- 387 uracil
- 388 valerophenone
- 389 vanillic acid
- 390 vanillin
- 391 vulgarin
- 392 wallichilide
- 393 WLN: 2VR
- 394 WLN: Q1R
- 395 WLN: T5OJ BVO1
- 396 WLN: VH6
- 397 xiongterpene
- 398 Z-6,8',7,3'-diligustilide
- 399 zosimin
- 400  $\beta$ -sesquiphellandrene
- 401  $\delta$ -elemene

---

<sup>a</sup> The compounds with the suffix `_qt` of their names refer to the deglycosylated form of their prototypes.

**Table S2** 236 Putative targets of FQD

| <b>No.</b> | <b>Target/Protein name</b>                              | <b>UniProt ID</b> | <b>Gene symbol</b> |
|------------|---------------------------------------------------------|-------------------|--------------------|
| 1          | ATP-binding cassette sub-family A member 1              | ABCA1_HUMAN       | <i>ABCA1</i>       |
| 2          | Multidrug resistance protein 1                          | MDR1_HUMAN        | <i>ABCB1</i>       |
| 3          | ATP-binding cassette, sub-family B (MDR/TAP), member 11 | ABCBB_HUMAN       | <i>ABCB11</i>      |
| 4          | Multidrug resistance protein 3                          | MDR3_HUMAN        | <i>ABCB4</i>       |
| 5          | ATP-binding cassette sub-family B member 5              | ABCB5_HUMAN       | <i>ABCB5</i>       |
| 6          | ATP-binding cassette, sub-family G (WHITE), member 5    | ABCG5_HUMAN       | <i>ABCG5</i>       |
| 7          | ATP-binding cassette, sub-family G (WHITE), member 8    | ABCG8_HUMAN       | <i>ABCG8</i>       |
| 8          | Acetyl-coa carboxylase alpha                            | ACACA_HUMAN       | <i>ACACA</i>       |
| 9          | Acetylcholinesterase                                    | ACES_HUMAN        | <i>ACHE</i>        |
| 10         | Alcohol dehydrogenase 1B                                | ADH1B_HUMAN       | <i>ADH1B</i>       |
| 11         | Alcohol dehydrogenase 1C                                | ADH1G_HUMAN       | <i>ADH1C</i>       |
| 12         | Alpha-1A adrenergic receptor                            | ADA1A_HUMAN       | <i>ADRA1A</i>      |
| 13         | Alpha-1B adrenergic receptor                            | ADA1B_HUMAN       | <i>ADRA1B</i>      |
| 14         | Alpha-1D adrenergic receptor                            | ADA1D_HUMAN       | <i>ADRA1D</i>      |
| 15         | Alpha-2A adrenergic receptor                            | ADA2A_HUMAN       | <i>ADRA2A</i>      |
| 16         | Alpha-2B adrenergic receptor                            | ADA2B_HUMAN       | <i>ADRA2B</i>      |
| 17         | Alpha-2C adrenergic receptor                            | ADA2C_HUMAN       | <i>ADRA2C</i>      |
| 18         | Beta-1 adrenergic receptor                              | ADRB1_HUMAN       | <i>ADRB1</i>       |
| 19         | Beta-2 adrenergic receptor                              | ADRB2_HUMAN       | <i>ADRB2</i>       |
| 20         | Aldose reductase                                        | ALDR_HUMAN        | <i>AKR1B1</i>      |
| 21         | RAC-alpha serine/threonine-protein kinase               | AKT1_HUMAN        | <i>AKT1</i>        |
| 22         | Arachidonate 12-lipoxygenase 12S-type                   | LOX12_HUMAN       | <i>ALOX12</i>      |
| 23         | Arachidonate 12-lipoxygenase 12R-type                   | LX12B_HUMAN       | <i>ALOX12B</i>     |
| 24         | Arachidonate 15-lipoxygenase                            | LOX15_HUMAN       | <i>ALOX15</i>      |
| 25         | Arachidonate 15-lipoxygenase B                          | LX15B_HUMAN       | <i>ALOX15B</i>     |
| 26         | Arachidonate 5-lipoxygenase                             | LOX5_HUMAN        | <i>ALOX5</i>       |
| 27         | Epidermis-type lipoxygenase 3                           | LOXE3_HUMAN       | <i>ALOXE3</i>      |
| 28         | Apolipoprotein E                                        | APOE_HUMAN        | <i>APOE</i>        |
| 29         | Androgen receptor                                       | ANDR_HUMAN        | <i>AR</i>          |
| 30         | ATP synthase F(0) complex subunit C2, mitochondrial     | AT5G2_HUMAN       | <i>ATP5G2</i>      |
| 31         | Cholinesterase                                          | CHLE_HUMAN        | <i>BCHE</i>        |
| 32         | Apoptosis regulator Bcl-2                               | BCL2_HUMAN        | <i>BCL2</i>        |
| 33         | Brain-derived neurotrophic factor                       | BDNF_HUMAN        | <i>BDNF</i>        |
| 34         | Carbonic anhydrase 1                                    | CAH1_HUMAN        | <i>CA1</i>         |
| 35         | Carbonic anhydrase 12                                   | CAH12_HUMAN       | <i>CA12</i>        |
| 36         | Carbonic anhydrase 13                                   | CAH13_HUMAN       | <i>CA13</i>        |
| 37         | Carbonic anhydrase 14                                   | CAH14_HUMAN       | <i>CA14</i>        |
| 38         | Carbonic anhydrase II                                   | CAH2_HUMAN        | <i>CA2</i>         |

|    |                                                           |             |          |
|----|-----------------------------------------------------------|-------------|----------|
| 39 | Carbonic anhydrase 3                                      | CAH3_HUMAN  | CA3      |
| 40 | Carbonic anhydrase 5A, mitochondrial                      | CAH5A_HUMAN | CA5A     |
| 41 | Carbonic anhydrase 5B, mitochondrial                      | CAH5B_HUMAN | CA5B     |
| 42 | Carbonic anhydrase 6                                      | CAH6_HUMAN  | CA6      |
| 43 | Carbonic anhydrase 7                                      | CAH7_HUMAN  | CA7      |
| 44 | Carbonic anhydrase 9                                      | CAH9_HUMAN  | CA9      |
| 45 | Voltage-dependent L-type calcium channel subunit alpha-1S | CAC1S_HUMAN | CACNA1S  |
| 46 | Calmodulin 1                                              | CALM_HUMAN  | CALM1    |
| 47 | Caspase 3                                                 | CASP3_HUMAN | CASP3    |
| 48 | Cyclin-A2                                                 | CCNA2_HUMAN | CCNA2    |
| 49 | G1/S-specific cyclin-D1                                   | CCND1_HUMAN | CCND1    |
| 50 | C-C chemokine receptor type 1                             | CCR1_HUMAN  | CCR1     |
| 51 | C-C chemokine receptor type 2                             | CCR2_HUMAN  | CCR2     |
| 52 | C-C chemokine receptor type 3                             | CCR3_HUMAN  | CCR3     |
| 53 | C-C chemokine receptor type 5                             | CCR5_HUMAN  | CCR5     |
| 54 | C-C chemokine receptor-like 2                             | CCRL2_HUMAN | CCRL2    |
| 55 | Cell division protein kinase 2                            | CDK2_HUMAN  | CDK2     |
| 56 | Cystic fibrosis transmembrane conductance regulator       | CFTR_HUMAN  | CFTR     |
| 57 | Choline O-acetyltransferase                               | CLAT_HUMAN  | CHAT     |
| 58 | Serine/threonine-protein kinase Chk1                      | CHK1_HUMAN  | CHEK1    |
| 59 | Neuronal acetylcholine receptor subunit alpha-7           | ACHA7_HUMAN | CHRFAM7A |
| 60 | Muscarinic acetylcholine receptor M1                      | ACM1_HUMAN  | CHRM1    |
| 61 | Muscarinic acetylcholine receptor M2                      | ACM2_HUMAN  | CHRM2    |
| 62 | Muscarinic acetylcholine receptor M3                      | ACM3_HUMAN  | CHRM3    |
| 63 | Muscarinic acetylcholine receptor M4                      | ACM4_HUMAN  | CHRM4    |
| 64 | Muscarinic acetylcholine receptor M5                      | ACM5_HUMAN  | CHRM5    |
| 65 | Neuronal acetylcholine receptor subunit alpha-2           | ACHA2_HUMAN | CHRNA2   |
| 66 | Neuronal acetylcholine receptor protein, alpha-7 chain    | ACHA7_HUMAN | CHRNA7   |
| 67 | Camp responsive element binding protein 1                 | CREB1_HUMAN | CREB1    |
| 68 | Quinone oxidoreductase                                    | QOR_HUMAN   | CRYZ     |
| 69 | Chymotrypsinogen B                                        | CTRB1_HUMAN | CTRB1    |
| 70 | Interleukin 8                                             | IL8_HUMAN   | CXCL8    |
| 71 | Cytochrome c, somatic                                     | CYC_HUMAN   | CYCS     |
| 72 | Steroid 17-alpha-hydroxylase/17,20 lyase                  | CP17A_HUMAN | CYP17A1  |
| 73 | Cytochrome P450 19A1                                      | CP19A_HUMAN | CYP19A1  |
| 74 | Cytochrome P450, family 1, subfamily A, polypeptide 1     | CP1A1_HUMAN | CYP1A1   |
| 75 | Cytochrome P450, family 1, subfamily A, polypeptide 2     | CP1A2_HUMAN | CYP1A2   |

|     |                                                               |             |                 |
|-----|---------------------------------------------------------------|-------------|-----------------|
| 76  | Cytochrome P450 2D6                                           | CP2D6_HUMAN | <i>CYP2D6</i>   |
| 77  | Cytochrome P450 2J2                                           | CP2J2_HUMAN | <i>CYP2J2</i>   |
| 78  | Cytochrome P450 3A4                                           | CP3A4_HUMAN | <i>CYP3A4</i>   |
| 79  | Lanosterol 14-alpha demethylase                               | CP51A_HUMAN | <i>CYP51A1</i>  |
| 80  | Cytochrome P450, family 7, subfamily A, polypeptide 1         | CP7A1_HUMAN | <i>CYP7A1</i>   |
| 81  | 2,4-dienoyl coa reductase 1, mitochondrial                    | DECR_HUMAN  | <i>DECR1</i>    |
| 82  | 24-dehydrocholesterol reductase                               | DHC24_HUMAN | <i>DHCR24</i>   |
| 83  | Dihydrofolate reductase                                       | DYR_HUMAN   | <i>DHFR</i>     |
| 84  | Dipeptidyl peptidase IV                                       | DPP4_HUMAN  | <i>DPP4</i>     |
| 85  | Dopamine D1 receptor                                          | DRD1_HUMAN  | <i>DRD1</i>     |
| 86  | D(2) dopamine receptor                                        | DRD2_HUMAN  | <i>DRD2</i>     |
| 87  | D(4) dopamine receptor                                        | DRD4_HUMAN  | <i>DRD4</i>     |
| 88  | D(1B) dopamine receptor                                       | DRD5_HUMAN  | <i>DRD5</i>     |
| 89  | Dual specificity tyrosine-phosphorylation-regulated kinase 1A | DYR1A_HUMAN | <i>DYRK1A</i>   |
| 90  | Ecto-NOX disulfide-thiol exchanger 1                          | ENOX1_HUMAN | <i>ENOX1</i>    |
| 91  | Endogenous retrovirus group FRD, member 1                     | SYCY2_HUMAN | <i>ERVFRD-1</i> |
| 92  | Estrogen receptor                                             | ESR1_HUMAN  | <i>ESR1</i>     |
| 93  | Estrogen receptor beta                                        | ESR2_HUMAN  | <i>ESR2</i>     |
| 94  | Coagulation factor Xa                                         | FA10_HUMAN  | <i>F10</i>      |
| 95  | Thrombin                                                      | THRB_HUMAN  | <i>F2</i>       |
| 96  | Coagulation factor VII                                        | FA7_HUMAN   | <i>F7</i>       |
| 97  | Fatty acid-binding protein 12                                 | FBP12_HUMAN | <i>FABP12</i>   |
| 98  | Fatty acid-binding protein heart                              | FABPH_HUMAN | <i>FABP3</i>    |
| 99  | Fatty acid-binding protein adipocyte                          | FABP4_HUMAN | <i>FABP4</i>    |
| 100 | Fatty acid-binding protein epidermal                          | FABP5_HUMAN | <i>FABP5</i>    |
| 101 | Fatty acid-binding protein brain                              | FABP7_HUMAN | <i>FABP7</i>    |
| 102 | Fatty acid-binding protein 9                                  | FABP9_HUMAN | <i>FABP9</i>    |
| 103 | FBJ murine osteosarcoma viral oncogene homolog                | FOS_HUMAN   | <i>FOS</i>      |
| 104 | Glucose-6-phosphate dehydrogenase                             | G6PD_HUMAN  | <i>G6PD</i>     |
| 105 | Gamma-aminobutyric acid receptor subunit alpha-1              | GBRA1_HUMAN | <i>GABRA1</i>   |
| 106 | Gamma-aminobutyric-acid receptor alpha-2 subunit              | GBRA2_HUMAN | <i>GABRA2</i>   |
| 107 | Gamma-aminobutyric-acid receptor alpha-3 subunit              | GBRA3_HUMAN | <i>GABRA3</i>   |
| 108 | Gamma-aminobutyric-acid receptor alpha-5 subunit              | GBRA5_HUMAN | <i>GABRA5</i>   |
| 109 | Gamma-aminobutyric-acid receptor subunit alpha-6              | GBRA6_HUMAN | <i>GABRA6</i>   |
| 110 | Gonadotropin-releasing hormone 1                              | GON1_HUMAN  | <i>GNRH1</i>    |

|     |                                                              |   |              |                 |
|-----|--------------------------------------------------------------|---|--------------|-----------------|
| 111 | Glutamate receptor 2                                         |   | GRIA2_HUMAN  | <i>GRIA2</i>    |
| 112 | Glycogen synthase kinase-3 beta                              |   | GSK3B_HUMAN  | <i>GSK3B</i>    |
| 113 | Heparin-binding EGF-like growth factor                       |   | HBEGF_HUMAN  | <i>HBEGF</i>    |
| 114 | Hypoxia inducible factor 1                                   |   | HIF1A_HUMAN  | <i>HIF1A</i>    |
| 115 | High mobility group box 1                                    |   | HMGB1_HUMAN  | <i>HMGB1</i>    |
| 116 | 3-hydroxy-3-methylglutaryl-coenzyme reductase                | A | HMDH_HUMAN   | <i>HMGCR</i>    |
| 117 | Heme oxygenase 1                                             |   | HMOX1_HUMAN  | <i>HMOX1</i>    |
| 118 | Histamine receptor H1                                        |   | HRH1_HUMAN   | <i>HRH1</i>     |
| 119 | Heat shock protein HSP 90                                    |   | HS90B_HUMAN  | <i>HSP90AB1</i> |
| 120 | 5-hydroxytryptamine receptor 1A                              |   | 5HT1A_HUMAN  | <i>HTR1A</i>    |
| 121 | 5-hydroxytryptamine receptor 1B                              |   | 5HT1B_HUMAN  | <i>HTR1B</i>    |
| 122 | 5-hydroxytryptamine 2A receptor                              |   | 5HT2A_HUMAN  | <i>HTR2A</i>    |
| 123 | 5-hydroxytryptamine receptor 2B                              |   | 5HT2B_HUMAN  | <i>HTR2B</i>    |
| 124 | 5-hydroxytryptamine 2C receptor                              |   | 5HT2C_HUMAN  | <i>HTR2C</i>    |
| 125 | 5-hydroxytryptamine receptor 3A                              |   | 5HT3A_HUMAN  | <i>HTR3A</i>    |
| 126 | 5-hydroxytryptamine receptor 7                               |   | 5HT7R_HUMAN  | <i>HTR7</i>     |
| 127 | Intercellular adhesion molecule 1                            |   | ICAM1_HUMAN  | <i>ICAM1</i>    |
| 128 | Interferon, gamma                                            |   | IFNG_HUMAN   | <i>IFNG</i>     |
| 129 | Ig gamma-1 chain C region                                    |   | IGHG1_HUMAN  | <i>IGHG1</i>    |
| 130 | Interleukin 10                                               |   | IL10_HUMAN   | <i>IL10</i>     |
| 131 | Interleukin 6 (interferon, beta 2)                           |   | IL6_HUMAN    | <i>IL6</i>      |
| 132 | Integrin alpha-lib                                           |   | ITA2B_HUMAN  | <i>ITGA2B</i>   |
| 133 | Transcription factor AP-1                                    |   | JUN_HUMAN    | <i>JUN</i>      |
| 134 | Potassium voltage-gated channel subfamily H member 2         |   | KCNH2_HUMAN  | <i>KCNH2</i>    |
| 135 | Potassium inwardly-rectifying channel, subfamily J, member 1 |   | KCNJ1_HUMAN  | <i>KCNJ1</i>    |
| 136 | Potassium inwardly-rectifying channel, subfamily J, member 4 |   | KCNJ4_HUMAN  | <i>KCNJ4</i>    |
| 137 | Potassium channel, subfamily K, member 18                    |   | KCNKI_HUMAN  | <i>KCNK18</i>   |
| 138 | Calcium-activated potassium channel subunit alpha 1          |   | KCMA1_HUMAN  | <i>KCNMA1</i>   |
| 139 | Vascular endothelial growth factor receptor 2                |   | VGFR2_HUMAN  | <i>KDR</i>      |
| 140 | Kiaa0101                                                     |   | G9G6D7_HUMAN | <i>KIAA0101</i> |
| 141 | Klotho                                                       |   | KLOT_HUMAN   | <i>KL</i>       |
| 142 | Low-density lipoprotein receptor                             |   | LDLR_HUMAN   | <i>LDLR</i>     |
| 143 | Low-density lipoprotein receptor-related protein 8           |   | LRP8_HUMAN   | <i>LRP8</i>     |
| 144 | Leukotriene A-4 hydrolase                                    |   | LKHA4_HUMAN  | <i>LTA4H</i>    |
| 145 | Lysozyme                                                     |   | LYSC_HUMAN   | <i>LYZ</i>      |
| 146 | Amine oxidase [flavin-containing] B                          |   | AOFA_HUMAN   | <i>MAOA</i>     |
| 147 | Amine oxidase [flavin-containing] A                          |   | AOFB_HUMAN   | <i>MAOB</i>     |
| 148 | Microtubule-associated protein 2                             |   | MTAP2_HUMAN  | <i>MAP2</i>     |

|     |                                                                                 |             |                |
|-----|---------------------------------------------------------------------------------|-------------|----------------|
| 149 | Mitogen-activated protein kinase 1                                              | MK01_HUMAN  | <i>MAPK1</i>   |
| 150 | Mitogen-activated protein kinase 14                                             | MK14_HUMAN  | <i>MAPK14</i>  |
| 151 | Mitogen-activated protein kinase 3                                              | MK03_HUMAN  | <i>MAPK3</i>   |
| 152 | Microtubule-associated protein tau                                              | TAU_HUMAN   | <i>MAPT</i>    |
| 153 | Muscleblind-like protein 1                                                      | MBNL1_HUMAN | <i>MBNL1</i>   |
| 154 | Muscleblind-like protein 2                                                      | MBNL2_HUMAN | <i>MBNL2</i>   |
| 155 | Muscleblind-like protein 3                                                      | MBNL3_HUMAN | <i>MBNL3</i>   |
| 156 | Matrix metalloproteinase 9/gelatinase B                                         | MMP9_HUMAN  | <i>MMP9</i>    |
| 157 | Nicotinamide phosphoribosyltransferase                                          | NAMPT_HUMAN | <i>NAMPT</i>   |
| 158 | Nuclear receptor coactivator 1                                                  | NCOA1_HUMAN | <i>NCOA1</i>   |
| 159 | Nuclear receptor coactivator 2                                                  | NCOA2_HUMAN | <i>NCOA2</i>   |
| 160 | Nuclear factor (erythroid-derived 2)-like 2                                     | NF2L2_HUMAN | <i>NFE2L2</i>  |
| 161 | Nitric oxide synthase, inducible                                                | NOS2_HUMAN  | <i>NOS2</i>    |
| 162 | Nitric-oxide synthase, endothelial                                              | NOS3_HUMAN  | <i>NOS3</i>    |
| 163 | Oxysterols receptor LXR-beta                                                    | NR1H2_HUMAN | <i>NR1H2</i>   |
| 164 | Oxysterols receptor LXR-alpha                                                   | NR1H3_HUMAN | <i>NR1H3</i>   |
| 165 | Glucocorticoid receptor                                                         | GCR_HUMAN   | <i>NR3C1</i>   |
| 166 | Mineralocorticoid receptor                                                      | MCR_HUMAN   | <i>NR3C2</i>   |
| 167 | Delta-type opioid receptor                                                      | OPRD_HUMAN  | <i>OPRD1</i>   |
| 168 | Kappa-type opioid receptor                                                      | OPRK_HUMAN  | <i>OPRK1</i>   |
| 169 | Nociceptin receptor                                                             | OPRX_HUMAN  | <i>OPRL1</i>   |
| 170 | Mu-type opioid receptor                                                         | OPRM_HUMAN  | <i>OPRM1</i>   |
| 171 | Oxytocin/neurophysin I prepropeptide                                            | NEU1_HUMAN  | <i>OXT</i>     |
| 172 | Proprotein convertase subtilisin/kexin type 9                                   | PCSK9_HUMAN | <i>PCSK9</i>   |
| 173 | Camp and camp-inhibited cgmp 3',5'-cyclic phosphodiesterase 10A                 | PDE10_HUMAN | <i>PDE10A</i>  |
| 174 | CGMP-inhibited 3',5'-cyclic phosphodiesterase A                                 | PDE3A_HUMAN | <i>PDE3A</i>   |
| 175 | Type IV phosphodiesterase                                                       | PDE4D_HUMAN | <i>PDE4D</i>   |
| 176 | CGMP-specific 3',5'-cyclic phosphodiesterase                                    | PDE5A_HUMAN | <i>PDE5A</i>   |
| 177 | Phosphogluconate dehydrogenase                                                  | 6PGD_HUMAN  | <i>PGD</i>     |
| 178 | Placental growth factor                                                         | PLGF_HUMAN  | <i>PGF</i>     |
| 179 | Progesterone receptor                                                           | PRGR_HUMAN  | <i>PGR</i>     |
| 180 | Phosphatidylinositol-4,5-bisphosphate 3-kinase catalytic subunit, gamma isoform | PK3CG_HUMAN | <i>PIK3CG</i>  |
| 181 | Proto-oncogene serine/threonine-protein kinase Pim-1                            | PIM1_HUMAN  | <i>PIM1</i>    |
| 182 | Camp-dependent protein kinase inhibitor alpha                                   | IPKA_HUMAN  | <i>PKIA</i>    |
| 183 | Phospholipase A2, group IB                                                      | PA21B_HUMAN | <i>PLA2G1B</i> |
| 184 | Phospholipase A2, group IIA                                                     | PA2GA_HUMAN | <i>PLA2G2A</i> |
| 185 | Phospholipase A2, group IVA                                                     | PA24A_HUMAN | <i>PLA2G4A</i> |
| 186 | Urokinase-type plasminogen activator                                            | UROK_HUMAN  | <i>PLAU</i>    |
| 187 | Myelin P2 protein                                                               | MYP2_HUMAN  | <i>PMP2</i>    |

|     |                                                             |             |                |
|-----|-------------------------------------------------------------|-------------|----------------|
| 188 | Serum paraoxonase/arylesterase 1                            | PON1_HUMAN  | <i>PON1</i>    |
| 189 | Peroxisome proliferator-activated receptor alpha            | PPARA_HUMAN | <i>PPARA</i>   |
| 190 | Peroxisome proliferator-activated receptor delta            | PPARD_HUMAN | <i>PPARD</i>   |
| 191 | Peroxisome proliferator activated receptor gamma            | PPARG_HUMAN | <i>PPARG</i>   |
| 192 | Peptidylprolyl isomerase G (cyclophilin G)                  | PPIG_HUMAN  | <i>PPIG</i>    |
| 193 | Protein kinase, AMP-activated, alpha 1 catalytic subunit    | AAPK1_HUMAN | <i>PRKAA1</i>  |
| 194 | Mrna of PKA Catalytic Subunit C-alpha                       | KAPCA_HUMAN | <i>PRKACA</i>  |
| 195 | Protein kinase C, alpha                                     | KPCA_HUMAN  | <i>PRKCA</i>   |
| 196 | Protein kinase C, gamma                                     | KPCG_HUMAN  | <i>PRKCG</i>   |
| 197 | Prolactin                                                   | PRL_HUMAN   | <i>PRL</i>     |
| 198 | Trypsin-1                                                   | TRY1_HUMAN  | <i>PRSS1</i>   |
| 199 | Prostaglandin G/H synthase 1                                | PGH1_HUMAN  | <i>PTGS1</i>   |
| 200 | Prostaglandin G/H synthase 2                                | PGH2_HUMAN  | <i>PTGS2</i>   |
| 201 | Mrna of Protein-tyrosine phosphatase, non-receptor type 1   | PTN1_HUMAN  | <i>PTPN1</i>   |
| 202 | Retinoblastoma 1                                            | RB_HUMAN    | <i>RB1</i>     |
| 203 | Renin                                                       | RENI_HUMAN  | <i>REN</i>     |
| 204 | Ras homolog family member A                                 | RHOA_HUMAN  | <i>RHOA</i>    |
| 205 | Retinoic acid receptor RXR-alpha                            | RXRA_HUMAN  | <i>RXRA</i>    |
| 206 | Retinoic acid receptor RXR-gamma                            | RXRG_HUMAN  | <i>RXRG</i>    |
| 207 | Sodium channel protein type 5 subunit alpha                 | SCN5A_HUMAN | <i>SCN5A</i>   |
| 208 | Sigma non-opioid intracellular receptor 1                   | SGMR1_HUMAN | <i>SIGMAR1</i> |
| 209 | Sodium-dependent noradrenaline transporter                  | SC6A2_HUMAN | <i>SLC6A2</i>  |
| 210 | Sodium-dependent dopamine transporter                       | SC6A3_HUMAN | <i>SLC6A3</i>  |
| 211 | Sodium-dependent serotonin transporter                      | SC6A4_HUMAN | <i>SLC6A4</i>  |
| 212 | Solute carrier organic anion transporter family, member 1B1 | SO1B1_HUMAN | <i>SLCO1B1</i> |
| 213 | Solute carrier organic anion transporter family member 1B3  | SO1B3_HUMAN | <i>SLCO1B3</i> |
| 214 | Sterol regulatory element binding transcription factor 1    | SRBP1_HUMAN | <i>SREBF1</i>  |
| 215 | Sterol regulatory element binding transcription factor 2    | SRBP2_HUMAN | <i>SREBF2</i>  |
| 216 | Somatostatin                                                | SMS_HUMAN   | <i>SST</i>     |
| 217 | Serine/threonine kinase 11                                  | STK11_HUMAN | <i>STK11</i>   |
| 218 | Tachykinin, precursor 1                                     | TKN1_HUMAN  | <i>TAC1</i>    |
| 219 | Thromboxane A2 receptor                                     | TA2R_HUMAN  | <i>TBXA2R</i>  |
| 220 | Thromboxane-A synthase                                      | THAS_HUMAN  | <i>TBXAS1</i>  |
| 221 | Tyrosyl-DNA phosphodiesterase 1                             | TYDP1_HUMAN | <i>TDP1</i>    |



|     |                                                                    |  |  |             |                  |
|-----|--------------------------------------------------------------------|--|--|-------------|------------------|
| 222 | Transmembrane protease, serine 11D                                 |  |  | TM11D_HUMAN | <i>TMPRSS11D</i> |
| 223 | Tumor necrosis factor                                              |  |  | TNFA_HUMAN  | <i>TNF</i>       |
| 224 | DNA topoisomerase 1                                                |  |  | TOP1_HUMAN  | <i>TOP1</i>      |
| 225 | DNA topoisomerase 2-alpha                                          |  |  | TOP2A_HUMAN | <i>TOP2A</i>     |
| 226 | Cellular tumor antigen p53                                         |  |  | P53_HUMAN   | <i>TP53</i>      |
| 227 | Transient receptor potential cation channel, subfamily M, member 5 |  |  | TRPM5_HUMAN | <i>TRPM5</i>     |
| 228 | Transient receptor potential cation channel, subfamily V, member 4 |  |  | TRPV4_HUMAN | <i>TRPV4</i>     |
| 229 | Tyrosinase                                                         |  |  | TYRO_HUMAN  | <i>TYR</i>       |
| 230 | UDP glucuronosyltransferase 1 family, polypeptide A10              |  |  | UD110_HUMAN | <i>UGT1A10</i>   |
| 231 | UDP glucuronosyltransferase 1 family, polypeptide A3               |  |  | UD13_HUMAN  | <i>UGT1A3</i>    |
| 232 | UDP glucuronosyltransferase 1 family, polypeptide A7               |  |  | UD17_HUMAN  | <i>UGT1A7</i>    |
| 233 | UDP glucuronosyltransferase 1 family, polypeptide A8               |  |  | UD18_HUMAN  | <i>UGT1A8</i>    |
| 234 | Vascular endothelial growth factor A                               |  |  | VEGFA_HUMAN | <i>VEGFA</i>     |
| 235 | Very low-density lipoprotein receptor                              |  |  | VLDLR_HUMAN | <i>VLDLR</i>     |
| 236 | WD and tetratricopeptide repeats 1                                 |  |  | WDTC1_HUMAN | <i>WDTC1</i>     |

---

**Table S3** Database of AD-related genes

| <b>No.</b> | <b>Gene symbol</b> |
|------------|--------------------|
| 1          | <i>A2M</i>         |
| 2          | <i>AATF</i>        |
| 3          | <i>ABCA1</i>       |
| 4          | <i>ABCA2</i>       |
| 5          | <i>ABCA7</i>       |
| 6          | <i>ACE</i>         |
| 7          | <i>ACHE</i>        |
| 8          | <i>ADAM10</i>      |
| 9          | <i>ADAM17</i>      |
| 10         | <i>ADAM19</i>      |
| 11         | <i>ADAM22</i>      |
| 12         | <i>AGAP1</i>       |
| 13         | <i>AGAP11</i>      |
| 14         | <i>AGER</i>        |
| 15         | <i>AKR1D1</i>      |
| 16         | <i>ALAS2</i>       |
| 17         | <i>ANKS1B</i>      |
| 18         | <i>APAF1</i>       |
| 19         | <i>APBA1</i>       |
| 20         | <i>APBA2</i>       |
| 21         | <i>APBA3</i>       |
| 22         | <i>APBB1</i>       |
| 23         | <i>APBB2</i>       |
| 24         | <i>APBB3</i>       |
| 25         | <i>APH1A</i>       |
| 26         | <i>APH1B</i>       |
| 27         | <i>APLP1</i>       |
| 28         | <i>APLP2</i>       |
| 29         | <i>APOC1</i>       |
| 30         | <i>APOE</i>        |
| 31         | <i>APP</i>         |
| 32         | <i>ARL10</i>       |
| 33         | <i>ARPP21</i>      |
| 34         | <i>ASAH2B</i>      |
| 35         | <i>ATF6</i>        |
| 36         | <i>ATP1B1</i>      |
| 37         | <i>ATP2A1</i>      |
| 38         | <i>ATP2A2</i>      |
| 39         | <i>ATP2A3</i>      |
| 40         | <i>ATP2B1</i>      |
| 41         | <i>ATP5F1A</i>     |
| 42         | <i>ATP5F1B</i>     |

|    |                |
|----|----------------|
| 43 | <i>ATP5F1C</i> |
| 44 | <i>ATP5F1D</i> |
| 45 | <i>ATP5F1E</i> |
| 46 | <i>ATP5MC1</i> |
| 47 | <i>ATP5MC2</i> |
| 48 | <i>ATP5MC3</i> |
| 49 | <i>ATP5PB</i>  |
| 50 | <i>ATP5PD</i>  |
| 51 | <i>ATP5PF</i>  |
| 52 | <i>ATP5PO</i>  |
| 53 | <i>ATXN2</i>   |
| 54 | <i>ATXN8OS</i> |
| 55 | <i>AZU1</i>    |
| 56 | <i>B3GALT2</i> |
| 57 | <i>BACE1</i>   |
| 58 | <i>BACE2</i>   |
| 59 | <i>BAD</i>     |
| 60 | <i>BCHE</i>    |
| 61 | <i>BDNF</i>    |
| 62 | <i>BECN1</i>   |
| 63 | <i>BID</i>     |
| 64 | <i>BLMH</i>    |
| 65 | <i>BPTF</i>    |
| 66 | <i>C4B</i>     |
| 67 | <i>CACNA1C</i> |
| 68 | <i>CACNA1D</i> |
| 69 | <i>CACNA1F</i> |
| 70 | <i>CACNA1S</i> |
| 71 | <i>CALHM1</i>  |
| 72 | <i>CALM1</i>   |
| 73 | <i>CALM2</i>   |
| 74 | <i>CALM3</i>   |
| 75 | <i>CALML3</i>  |
| 76 | <i>CALML4</i>  |
| 77 | <i>CALML5</i>  |
| 78 | <i>CALML6</i>  |
| 79 | <i>CAMK1G</i>  |
| 80 | <i>CAMKK2</i>  |
| 81 | <i>CAPN1</i>   |
| 82 | <i>CAPN2</i>   |
| 83 | <i>CAPRIN2</i> |
| 84 | <i>CASP1</i>   |
| 85 | <i>CASP12</i>  |
| 86 | <i>CASP2</i>   |

|     |                |
|-----|----------------|
| 87  | <i>CASP3</i>   |
| 88  | <i>CASP7</i>   |
| 89  | <i>CASP8</i>   |
| 90  | <i>CASP9</i>   |
| 91  | <i>CAT</i>     |
| 92  | <i>CCR2</i>    |
| 93  | <i>CD33</i>    |
| 94  | <i>CD40</i>    |
| 95  | <i>CD40LG</i>  |
| 96  | <i>CDK5</i>    |
| 97  | <i>CDK5R1</i>  |
| 98  | <i>CES1P1</i>  |
| 99  | <i>CETP</i>    |
| 100 | <i>CFH</i>     |
| 101 | <i>CHAT</i>    |
| 102 | <i>CHRNA7</i>  |
| 103 | <i>CIB1</i>    |
| 104 | <i>CLSTN1</i>  |
| 105 | <i>CLSTN3</i>  |
| 106 | <i>CLU</i>     |
| 107 | <i>COL25A1</i> |
| 108 | <i>COL4A5</i>  |
| 109 | <i>COX11</i>   |
| 110 | <i>COX4I1</i>  |
| 111 | <i>COX4I2</i>  |
| 112 | <i>COX5A</i>   |
| 113 | <i>COX5B</i>   |
| 114 | <i>COX6A1</i>  |
| 115 | <i>COX6A2</i>  |
| 116 | <i>COX6B1</i>  |
| 117 | <i>COX6B2</i>  |
| 118 | <i>COX6C</i>   |
| 119 | <i>COX7A1</i>  |
| 120 | <i>COX7A2</i>  |
| 121 | <i>COX7A2L</i> |
| 122 | <i>COX7B</i>   |
| 123 | <i>COX7B2</i>  |
| 124 | <i>COX7C</i>   |
| 125 | <i>COX8A</i>   |
| 126 | <i>COX8C</i>   |
| 127 | <i>CRH</i>     |
| 128 | <i>CRYAB</i>   |
| 129 | <i>CSNK1D</i>  |
| 130 | <i>CSPG4</i>   |

|     |                |
|-----|----------------|
| 131 | <i>CST3</i>    |
| 132 | <i>CTNNA3</i>  |
| 133 | <i>CTSB</i>    |
| 134 | <i>CTSD</i>    |
| 135 | <i>CTSG</i>    |
| 136 | <i>CXCL3</i>   |
| 137 | <i>CYC1</i>    |
| 138 | <i>CYCS</i>    |
| 139 | <i>CYP2D6</i>  |
| 140 | <i>CYP3A5</i>  |
| 141 | <i>CYP46A1</i> |
| 142 | <i>DBN1</i>    |
| 143 | <i>DCHS2</i>   |
| 144 | <i>DHCR24</i>  |
| 145 | <i>DKK1</i>    |
| 146 | <i>DLG4</i>    |
| 147 | <i>DLST</i>    |
| 148 | <i>DNAH6</i>   |
| 149 | <i>DNHD1</i>   |
| 150 | <i>DNM1L</i>   |
| 151 | <i>DNMBP</i>   |
| 152 | <i>DOCK3</i>   |
| 153 | <i>DPYSL2</i>  |
| 154 | <i>DYNC1I1</i> |
| 155 | <i>DYRK1A</i>  |
| 156 | <i>ECE1</i>    |
| 157 | <i>ECE2</i>    |
| 158 | <i>EDNRB</i>   |
| 159 | <i>EGFEM1P</i> |
| 160 | <i>EIF2AK2</i> |
| 161 | <i>EIF2AK3</i> |
| 162 | <i>ELMOD1</i>  |
| 163 | <i>EMP1</i>    |
| 164 | <i>EMP2</i>    |
| 165 | <i>EPHB2</i>   |
| 166 | <i>ERN1</i>    |
| 167 | <i>EXOC3L2</i> |
| 168 | <i>FADD</i>    |
| 169 | <i>FAM120B</i> |
| 170 | <i>FAM170B</i> |
| 171 | <i>FAM83C</i>  |
| 172 | <i>FARSB</i>   |
| 173 | <i>FAS</i>     |
| 174 | <i>FBXO4</i>   |

|     |                 |
|-----|-----------------|
| 175 | <i>FFAR4</i>    |
| 176 | <i>FGA</i>      |
| 177 | <i>FREM1</i>    |
| 178 | <i>FRMD4A</i>   |
| 179 | <i>GAB2</i>     |
| 180 | <i>GAL</i>      |
| 181 | <i>GAP43</i>    |
| 182 | <i>GAPDH</i>    |
| 183 | <i>GAPDHS</i>   |
| 184 | <i>GBA</i>      |
| 185 | <i>GDNF</i>     |
| 186 | <i>GFAP</i>     |
| 187 | <i>GLO1</i>     |
| 188 | <i>GLRX</i>     |
| 189 | <i>GNAQ</i>     |
| 190 | <i>GNG13</i>    |
| 191 | <i>GPC1</i>     |
| 192 | <i>GPR3</i>     |
| 193 | <i>GPRC5B</i>   |
| 194 | <i>GRIN1</i>    |
| 195 | <i>GRIN2A</i>   |
| 196 | <i>GRIN2B</i>   |
| 197 | <i>GRIN2C</i>   |
| 198 | <i>GRIN2D</i>   |
| 199 | <i>GRK2</i>     |
| 200 | <i>GRN</i>      |
| 201 | <i>GSAP</i>     |
| 202 | <i>GSK3A</i>    |
| 203 | <i>GSK3B</i>    |
| 204 | <i>GUCY1B3</i>  |
| 205 | <i>HACD3</i>    |
| 206 | <i>HDAC2</i>    |
| 207 | <i>HFE</i>      |
| 208 | <i>HLA-A</i>    |
| 209 | <i>HLA-DOA</i>  |
| 210 | <i>HMOX1</i>    |
| 211 | <i>HSD11B1</i>  |
| 212 | <i>HSD17B10</i> |
| 213 | <i>HSPA9</i>    |
| 214 | <i>HTR2A</i>    |
| 215 | <i>ICAM5</i>    |
| 216 | <i>IDE</i>      |
| 217 | <i>IL17A</i>    |
| 218 | <i>IL1A</i>     |

|     |                 |
|-----|-----------------|
| 219 | <i>IL1B</i>     |
| 220 | <i>IL6ST</i>    |
| 221 | <i>INS</i>      |
| 222 | <i>INTS1</i>    |
| 223 | <i>IQUB</i>     |
| 224 | <i>ITFG1</i>    |
| 225 | <i>ITM2B</i>    |
| 226 | <i>ITM2C</i>    |
| 227 | <i>ITPR1</i>    |
| 228 | <i>ITPR2</i>    |
| 229 | <i>ITPR3</i>    |
| 230 | <i>KCNIP3</i>   |
| 231 | <i>KCNIP4</i>   |
| 232 | <i>KCNK1</i>    |
| 233 | <i>KIAA1462</i> |
| 234 | <i>KITLG</i>    |
| 235 | <i>KLK6</i>     |
| 236 | <i>LAMB4</i>    |
| 237 | <i>LDLR</i>     |
| 238 | <i>LILRB2</i>   |
| 239 | <i>LMBRD2</i>   |
| 240 | <i>LPL</i>      |
| 241 | <i>LRP1</i>     |
| 242 | <i>LRP8</i>     |
| 243 | <i>LRRK2</i>    |
| 244 | <i>MALRD1</i>   |
| 245 | <i>MAOB</i>     |
| 246 | <i>MAP1B</i>    |
| 247 | <i>MAP2</i>     |
| 248 | <i>MAPK1</i>    |
| 249 | <i>MAPK3</i>    |
| 250 | <i>MAPK8</i>    |
| 251 | <i>MAPT</i>     |
| 252 | <i>MARK1</i>    |
| 253 | <i>MARK4</i>    |
| 254 | <i>MEOX2</i>    |
| 255 | <i>MICAL2</i>   |
| 256 | <i>MICALL2</i>  |
| 257 | <i>MME</i>      |
| 258 | <i>MPO</i>      |
| 259 | <i>MSR1</i>     |
| 260 | <i>MT1G</i>     |
| 261 | <i>MT3</i>      |
| 262 | <i>MT-ATP6</i>  |

|     |                      |
|-----|----------------------|
| 263 | <i>MT-ATP8</i>       |
| 264 | <i>MT-CO1</i>        |
| 265 | <i>MT-CO2</i>        |
| 266 | <i>MT-CO3</i>        |
| 267 | <i>MT-CYB</i>        |
| 268 | <i>MT-ND1</i>        |
| 269 | <i>MT-ND2</i>        |
| 270 | <i>NAE1</i>          |
| 271 | <i>NCSTN</i>         |
| 272 | <i>NDRG2</i>         |
| 273 | <i>NDUFA1</i>        |
| 274 | <i>NDUFA10</i>       |
| 275 | <i>NDUFA11</i>       |
| 276 | <i>NDUFA12</i>       |
| 277 | <i>NDUFA13</i>       |
| 278 | <i>NDUFA2</i>        |
| 279 | <i>NDUFA3</i>        |
| 280 | <i>NDUFA4</i>        |
| 281 | <i>NDUFA4L2</i>      |
| 282 | <i>NDUFA5</i>        |
| 283 | <i>NDUFA6</i>        |
| 284 | <i>NDUFA7</i>        |
| 285 | <i>NDUFA8</i>        |
| 286 | <i>NDUFA9</i>        |
| 287 | <i>NDUFAB1</i>       |
| 288 | <i>NDUFB1</i>        |
| 289 | <i>NDUFB10</i>       |
| 290 | <i>NDUFB11</i>       |
| 291 | <i>NDUFB2</i>        |
| 292 | <i>NDUFB3</i>        |
| 293 | <i>NDUFB4</i>        |
| 294 | <i>NDUFB5</i>        |
| 295 | <i>NDUFB6</i>        |
| 296 | <i>NDUFB7</i>        |
| 297 | <i>NDUFB8</i>        |
| 298 | <i>NDUFB9</i>        |
| 299 | <i>NDUFC1</i>        |
| 300 | <i>NDUFC2</i>        |
| 301 | <i>NDUFC2-KCTD14</i> |
| 302 | <i>NDUFS1</i>        |
| 303 | <i>NDUFS2</i>        |
| 304 | <i>NDUFS3</i>        |
| 305 | <i>NDUFS4</i>        |
| 306 | <i>NDUFS5</i>        |



|     |               |
|-----|---------------|
| 307 | <i>NDUFS6</i> |
| 308 | <i>NDUFS7</i> |
| 309 | <i>NDUFS8</i> |
| 310 | <i>NDUFV1</i> |
| 311 | <i>NDUFV2</i> |
| 312 | <i>NDUFV3</i> |
| 313 | <i>NEFL</i>   |
| 314 | <i>NELL2</i>  |
| 315 | <i>NGF</i>    |
| 316 | <i>NGFR</i>   |
| 317 | <i>NLRP3</i>  |
| 318 | <i>NOS1</i>   |
| 319 | <i>NOS2</i>   |
| 320 | <i>NOS3</i>   |
| 321 | <i>NOTCH1</i> |
| 322 | <i>NQO1</i>   |
| 323 | <i>NRG1</i>   |
| 324 | <i>NRGN</i>   |
| 325 | <i>NT5E</i>   |
| 326 | <i>NTRK1</i>  |
| 327 | <i>NTRK2</i>  |
| 328 | <i>OGDH</i>   |
| 329 | <i>OGT</i>    |
| 330 | <i>OLR1</i>   |
| 331 | <i>PADI2</i>  |
| 332 | <i>PAK1</i>   |
| 333 | <i>PAQR9</i>  |
| 334 | <i>PARK2</i>  |
| 335 | <i>PARM1</i>  |
| 336 | <i>PAXIP1</i> |
| 337 | <i>PCDH7</i>  |
| 338 | <i>PCSK1N</i> |
| 339 | <i>PDE1C</i>  |
| 340 | <i>PDE2A</i>  |
| 341 | <i>PI4KA</i>  |
| 342 | <i>PICALM</i> |
| 343 | <i>PIN1</i>   |
| 344 | <i>PITRM1</i> |
| 345 | <i>PLAU</i>   |
| 346 | <i>PLCB1</i>  |
| 347 | <i>PLCB2</i>  |
| 348 | <i>PLCB3</i>  |
| 349 | <i>PLCB4</i>  |
| 350 | <i>PLCE1</i>  |

|     |                 |
|-----|-----------------|
| 351 | <i>PLD3</i>     |
| 352 | <i>PPIF</i>     |
| 353 | <i>PPP3CA</i>   |
| 354 | <i>PPP3CB</i>   |
| 355 | <i>PPP3CC</i>   |
| 356 | <i>PPP3R1</i>   |
| 357 | <i>PPP3R2</i>   |
| 358 | <i>PRDM8</i>    |
| 359 | <i>PREPL</i>    |
| 360 | <i>PREX2</i>    |
| 361 | <i>PRND</i>     |
| 362 | <i>PRNP</i>     |
| 363 | <i>PSEN1</i>    |
| 364 | <i>PSEN2</i>    |
| 365 | <i>PSENE1</i>   |
| 366 | <i>PTGDS</i>    |
| 367 | <i>PTGS2</i>    |
| 368 | <i>PTPA</i>     |
| 369 | <i>PYCARD</i>   |
| 370 | <i>QPCT</i>     |
| 371 | <i>RASGRF1</i>  |
| 372 | <i>RBPM2</i>    |
| 373 | <i>RCAN1</i>    |
| 374 | <i>REG1A</i>    |
| 375 | <i>RELN</i>     |
| 376 | <i>REST</i>     |
| 377 | <i>RGL3</i>     |
| 378 | <i>RHOJ</i>     |
| 379 | <i>RPH3A</i>    |
| 380 | <i>RTN3</i>     |
| 381 | <i>RTN4</i>     |
| 382 | <i>RYR3</i>     |
| 383 | <i>S100B</i>    |
| 384 | <i>SDHA</i>     |
| 385 | <i>SDHB</i>     |
| 386 | <i>SDHC</i>     |
| 387 | <i>SDHD</i>     |
| 388 | <i>SEMA3A</i>   |
| 389 | <i>SEMA6D</i>   |
| 390 | <i>SERPINA3</i> |
| 391 | <i>SIRT1</i>    |
| 392 | <i>SLC17A8</i>  |
| 393 | <i>SLC18A3</i>  |
| 394 | <i>SLC1A2</i>   |

|     |                 |
|-----|-----------------|
| 395 | <i>SLC1A3</i>   |
| 396 | <i>SLC23A2</i>  |
| 397 | <i>SLC30A6</i>  |
| 398 | <i>SLC35D3</i>  |
| 399 | <i>SLC39A1</i>  |
| 400 | <i>SLC4A1</i>   |
| 401 | <i>SLC6A4</i>   |
| 402 | <i>SLIT1</i>    |
| 403 | <i>SNCA</i>     |
| 404 | <i>SNCB</i>     |
| 405 | <i>SNCG</i>     |
| 406 | <i>SOD1</i>     |
| 407 | <i>SORBS1</i>   |
| 408 | <i>SORCS3</i>   |
| 409 | <i>SORL1</i>    |
| 410 | <i>SQSTM1</i>   |
| 411 | <i>SREK1IP1</i> |
| 412 | <i>STH</i>      |
| 413 | <i>STMN2</i>    |
| 414 | <i>SYP</i>      |
| 415 | <i>TAAR1</i>    |
| 416 | <i>TARDBP</i>   |
| 417 | <i>TAT</i>      |
| 418 | <i>TF</i>       |
| 419 | <i>TFCP2</i>    |
| 420 | <i>TGFB1</i>    |
| 421 | <i>THOP1</i>    |
| 422 | <i>TM2D1</i>    |
| 423 | <i>TMED10</i>   |
| 424 | <i>TMEM259</i>  |
| 425 | <i>TNF</i>      |
| 426 | <i>TNFRSF1A</i> |
| 427 | <i>TNFRSF21</i> |
| 428 | <i>TNS1</i>     |
| 429 | <i>TNXB</i>     |
| 430 | <i>TREM2</i>    |
| 431 | <i>TREML2</i>   |
| 432 | <i>TRPM7</i>    |
| 433 | <i>TTBK1</i>    |
| 434 | <i>TTR</i>      |
| 435 | <i>UBB</i>      |
| 436 | <i>UBQLN1</i>   |
| 437 | <i>UCHL1</i>    |
| 438 | <i>UNC80</i>    |

|     |                |
|-----|----------------|
| 439 | <i>UQCR10</i>  |
| 440 | <i>UQCR11</i>  |
| 441 | <i>UQCRB</i>   |
| 442 | <i>UQCRC1</i>  |
| 443 | <i>UQCRC2</i>  |
| 444 | <i>UQCRFS1</i> |
| 445 | <i>UQCRH</i>   |
| 446 | <i>UQCRHL</i>  |
| 447 | <i>UQCRQ</i>   |
| 448 | <i>UTP11L</i>  |
| 449 | <i>VLDLR</i>   |
| 450 | <i>VPS26A</i>  |
| 451 | <i>VSNL1</i>   |
| 452 | <i>VSTM2L</i>  |
| 453 | <i>WBSCR17</i> |
| 454 | <i>ZAR1</i>    |
| 455 | <i>ZMYND11</i> |
| 456 | <i>ZNF425</i>  |

---

**Table S4** 245 PRTs of FQD in treating AD

| No. | Protein name                                                                | Gene Symbol     | Seed node | Degree Centrality (DC) |
|-----|-----------------------------------------------------------------------------|-----------------|-----------|------------------------|
| 1   | Neurotrophic receptor tyrosine kinase 1                                     | <i>NTRK1</i>    |           | 487                    |
| 2   | Calmodulin 3 (phosphorylase kinase, delta)                                  | <i>CALM3</i>    |           | 381                    |
| 3   | Calmodulin 1 (phosphorylase kinase, delta)                                  | <i>CALM1</i>    | TRUE      | 381                    |
| 4   | Calmodulin 2 (phosphorylase kinase, delta)                                  | <i>CALM2</i>    |           | 381                    |
| 5   | Amyloid beta precursor protein                                              | <i>APP</i>      |           | 364                    |
| 6   | Mitogen-activated protein kinase 1                                          | <i>MAPK1</i>    | TRUE      | 325                    |
| 7   | Tumor protein p53                                                           | <i>TP53</i>     |           | 315                    |
| 8   | Glycogen synthase kinase 3 beta                                             | <i>GSK3B</i>    | TRUE      | 314                    |
| 9   | Epidermal growth factor receptor                                            | <i>EGFR</i>     |           | 308                    |
| 10  | Cullin 3                                                                    | <i>CUL3</i>     |           | 307                    |
| 11  | Ubiquitin C                                                                 | <i>UBC</i>      |           | 301                    |
| 12  | Heat shock protein 90kda alpha family class A member 1                      | <i>HSP90AA1</i> |           | 298                    |
| 13  | Exportin 1                                                                  | <i>XPO1</i>     |           | 280                    |
| 14  | Mitogen-activated protein kinase 3                                          | <i>MAPK3</i>    | TRUE      | 272                    |
| 15  | Tyrosine 3-monooxygenase/tryptophan 5-monooxygenase activation protein zeta | <i>YWHAZ</i>    |           | 259                    |
| 16  | Minichromosome maintenance complex component 2                              | <i>MCM2</i>     |           | 253                    |
| 17  | Estrogen receptor 1                                                         | <i>ESR1</i>     |           | 251                    |
| 18  | Cyclin-dependent kinase 2                                                   | <i>CDK2</i>     |           | 237                    |
| 19  | Growth factor receptor bound protein 2                                      | <i>GRB2</i>     |           | 236                    |
| 20  | Y class B member 1                                                          | <i>HSP90AB1</i> |           | 231                    |
| 21  | COP9 signalosome subunit 5                                                  | <i>COP55</i>    |           | 223                    |
| 22  | E1A binding protein p300                                                    | <i>EP300</i>    |           | 216                    |
| 23  | Cullin 1                                                                    | <i>CUL1</i>     |           | 215                    |
| 24  | Valosin containing protein                                                  | <i>VCP</i>      |           | 213                    |
| 25  | Cullin 7                                                                    | <i>CUL7</i>     |           | 204                    |
| 26  | Nucleophosmin (nucleolar phosphoprotein B23, numatrin)                      | <i>NPM1</i>     |           | 202                    |
| 27  | Heat shock protein family A (Hsp70) member 5                                | <i>HSPA5</i>    |           | 195                    |
| 28  | Ring finger protein 2                                                       | <i>RNF2</i>     |           | 192                    |
| 29  | Parkin RBR E3 ubiquitin protein ligase                                      | <i>PARK2</i>    |           | 190                    |
| 30  | Coiled-coil domain containing 8                                             | <i>CCDC8</i>    |           | 189                    |
| 31  | Heat shock protein family A (Hsp70) member 8                                | <i>HSPA8</i>    |           | 187                    |
| 32  | HECT, UBA and WWE domain containing                                         | <i>HUWE1</i>    |           | 186                    |

|    |                                                                                |                |      |     |
|----|--------------------------------------------------------------------------------|----------------|------|-----|
|    | 1, E3 ubiquitin protein ligase                                                 |                |      |     |
| 33 | V-myc avian myelocytomatosis viral oncogene homolog                            | <i>MYC</i>     |      | 186 |
| 34 | Integrin subunit alpha 4                                                       | <i>ITGA4</i>   |      | 186 |
| 35 | Breast cancer 1                                                                | <i>BRCA1</i>   |      | 181 |
| 36 | Caspase 3                                                                      | <i>CASP3</i>   | TRUE | 181 |
| 37 | TNF receptor associated factor 6                                               | <i>TRAF6</i>   |      | 180 |
| 38 | Tyrosine 3-monooxygenase/tryptophan 5-monooxygenase activation protein epsilon | <i>YWHAE</i>   |      | 178 |
| 39 | Cell division cycle 5 like                                                     | <i>CDC5L</i>   |      | 174 |
| 40 | Catenin beta 1                                                                 | <i>CTNNB1</i>  |      | 174 |
| 41 | V-akt murine thymoma viral oncogene homolog 1                                  | <i>AKT1</i>    |      | 170 |
| 42 | SRC proto-oncogene, non-receptor tyrosine kinase                               | <i>SRC</i>     |      | 168 |
| 43 | Tyrosine 3-monooxygenase/tryptophan 5-monooxygenase activation protein theta   | <i>YWHAQ</i>   |      | 168 |
| 44 | Tyrosine 3-monooxygenase/tryptophan 5-monooxygenase activation protein gamma   | <i>YWHAG</i>   |      | 165 |
| 45 | EWS RNA binding protein 1                                                      | <i>EWSR1</i>   |      | 164 |
| 46 | CREB binding protein                                                           | <i>CREBBP</i>  |      | 163 |
| 47 | Inhibitor of kappa light polypeptide gene enhancer in B-cells, kinase gamma    | <i>IKBKG</i>   |      | 162 |
| 48 | MDM2 proto-oncogene                                                            | <i>MDM2</i>    |      | 159 |
| 49 | Nitric oxide synthase 2                                                        | <i>NOS2</i>    | TRUE | 156 |
| 50 | Heterogeneous nuclear ribonucleoprotein A1                                     | <i>HNRNPA1</i> |      | 156 |
| 51 | Tyrosine 3-monooxygenase/tryptophan 5-monooxygenase activation protein beta    | <i>YWHAB</i>   |      | 148 |
| 52 | Eukaryotic translation elongation factor 1 alpha 1                             | <i>EEF1A1</i>  |      | 147 |
| 53 | Casein kinase 2 alpha 1                                                        | <i>CSNK2A1</i> |      | 146 |
| 54 | Casein kinase 2 alpha 3                                                        | <i>CSNK2A3</i> |      | 146 |
| 55 | Heat shock protein family A (Hsp70) member 4                                   | <i>HSPA4</i>   |      | 146 |
| 56 | Tubulin beta class I                                                           | <i>TUBB</i>    |      | 144 |
| 57 | Heterogeneous nuclear ribonucleoprotein U (scaffold attachment factor A)       | <i>HNRNPU</i>  |      | 144 |
| 58 | Von Hippel-Lindau tumor suppressor                                             | <i>VHL</i>     |      | 143 |
| 59 | Cyclin-dependent kinase 1                                                      | <i>CDK1</i>    |      | 142 |
| 60 | PAN2 poly(A) specific ribonuclease                                             | <i>PAN2</i>    |      | 141 |

|    |                                                                               |                 |          |
|----|-------------------------------------------------------------------------------|-----------------|----------|
|    | subunit                                                                       |                 |          |
| 61 | Clathrin heavy chain                                                          | <i>CLTC</i>     | 138      |
| 62 | Arrestin beta 2                                                               | <i>ARRB2</i>    | 138      |
| 63 | FUS RNA binding protein                                                       | <i>FUS</i>      | 138      |
| 64 | Protein kinase, DNA-activated, catalytic polypeptide                          | <i>PRKDC</i>    | 135      |
| 65 | SMAD family member 3                                                          | <i>SMAD3</i>    | 135      |
| 66 | Ribosomal protein s27a                                                        | <i>RPS27A</i>   | 134      |
| 67 | Cullin 5                                                                      | <i>CUL5</i>     | 134      |
| 68 | Embryonic ectoderm development                                                | <i>EED</i>      | 134      |
| 69 | Androgen receptor                                                             | <i>AR</i>       | 132      |
| 70 | V-rel avian reticuloendotheliosis viral oncogene homolog A                    | <i>RELA</i>     | 132      |
| 71 | Filamin A                                                                     | <i>FLNA</i>     | 132      |
| 72 | Protein kinase C alpha                                                        | <i>PRKCA</i>    | 131      |
| 73 | Inhibitor of kappa light polypeptide gene enhancer in B-cells, kinase epsilon | <i>IKBKE</i>    | 129      |
| 74 | Mitogen-activated protein kinase kinase kinase 3                              | <i>MAP3K3</i>   | 129      |
| 75 | Receptor for activated C kinase 1                                             | <i>RACK1</i>    | 127      |
| 76 | SMAD family member 2                                                          | <i>SMAD2</i>    | 127      |
| 77 | Myosin, heavy chain 9, non-muscle                                             | <i>MYH9</i>     | 126      |
| 78 | Beta-transducin repeat containing E3 ubiquitin protein ligase                 | <i>BTRC</i>     | 126      |
| 79 | Jun proto-oncogene                                                            | <i>JUN</i>      | 125      |
| 80 | U2 small nuclear RNA auxiliary factor 2                                       | <i>U2AF2</i>    | 124      |
| 81 | Cell division cycle 37                                                        | <i>CDC37</i>    | 124      |
| 82 | Staufen double-stranded RNA binding protein 1                                 | <i>STAU1</i>    | 124      |
| 83 | Mitogen-activated protein kinase 14                                           | <i>MAPK14</i>   | 123      |
| 84 | Actin, beta                                                                   | <i>ACTB</i>     | 123      |
| 85 | Catalytic subunit alpha                                                       | <i>PPP1CA</i>   | 123      |
| 86 | Microtubule associated protein tau                                            | <i>MAPT</i>     | TRUE 123 |
| 87 | Tumor necrosis factor receptor superfamily member 1A                          | <i>TNFRSF1A</i> | 123      |
| 88 | Leucine-rich repeat kinase 2                                                  | <i>LRRK2</i>    | 122      |
| 89 | Cyclin-dependent kinase inhibitor 1A                                          | <i>CDKN1A</i>   | 122      |
| 90 | Histone deacetylase 6                                                         | <i>HDAC6</i>    | 122      |
| 91 | Sp1 transcription factor                                                      | <i>SP1</i>      | 121      |
| 92 | Poly(ADP-ribose) polymerase 1                                                 | <i>PARP1</i>    | 121      |
| 93 | Heat shock protein family B (small) member 1                                  | <i>HSPB1</i>    | 121      |
| 94 | TNF receptor associated factor 2                                              | <i>TRAF2</i>    | 121      |
| 95 | BCL2 associated athanogene 3                                                  | <i>BAG3</i>     | 120      |

|     |                                                                      |                 |      |     |
|-----|----------------------------------------------------------------------|-----------------|------|-----|
| 96  | Mitogen-activated protein kinase 8                                   | <i>MAPK8</i>    |      | 119 |
| 97  | Retinoblastoma 1                                                     | <i>RB1</i>      |      | 119 |
| 98  | FYN proto-oncogene, Src family tyrosine kinase                       | <i>FYN</i>      |      | 119 |
| 99  | Arrestin beta 1                                                      | <i>ARRB1</i>    |      | 118 |
| 100 | Alytic subunit alpha                                                 | <i>PPP2CA</i>   |      | 118 |
| 101 | ABL proto-oncogene 1, non-receptor tyrosine kinase                   | <i>ABL1</i>     |      | 117 |
| 102 | Nuclear factor of kappa light polypeptide gene enhancer in B-cells 1 | <i>NFKB1</i>    |      | 117 |
| 103 | Histone cluster 1, h3b                                               | <i>HIST1H3B</i> |      | 117 |
| 104 | Histone cluster 1, h3g                                               | <i>HIST1H3G</i> |      | 117 |
| 105 | Histone cluster 1, h3i                                               | <i>HIST1H3I</i> |      | 117 |
| 106 | Histone cluster 1, h3h                                               | <i>HIST1H3H</i> |      | 117 |
| 107 | Ster 1, h3j                                                          | <i>HIST1H3J</i> |      | 117 |
| 108 | Histone cluster 1, h3d                                               | <i>HIST1H3D</i> |      | 117 |
| 109 | Histone cluster 1, h3a                                               | <i>HIST1H3A</i> |      | 117 |
| 110 | Histone cluster 1, h3e                                               | <i>HIST1H3E</i> |      | 117 |
| 111 | Histone cluster 1, h3c                                               | <i>HIST1H3C</i> |      | 117 |
| 112 | Histone cluster 1, h3f                                               | <i>HIST1H3F</i> |      | 117 |
| 113 | Mitogen-activated protein kinase kinase 1                            | <i>MAP3K1</i>   |      | 116 |
| 114 | SHC (Src homology 2 domain containing) transforming protein 1        | <i>SHC1</i>     |      | 115 |
| 115 | STIP1 homology and U-box containing protein 1                        | <i>STUB1</i>    |      | 115 |
| 116 | R necrosis factor                                                    | <i>TNF</i>      | TRUE | 115 |
| 117 | Proteasome subunit alpha 3                                           | <i>PSMA3</i>    |      | 114 |
| 118 | Tubulin gamma 1                                                      | <i>TUBG1</i>    |      | 114 |
| 119 | Cbl proto-oncogene, E3 ubiquitin protein ligase                      | <i>CBL</i>      |      | 113 |
| 120 | Heat shock protein family A (Hsp70) member 9                         | <i>HSPA9</i>    |      | 112 |
| 121 | Raf-1 proto-oncogene, serine/threonine kinase                        | <i>RAF1</i>     |      | 111 |
| 122 | Sequestosome 1                                                       | <i>SQSTM1</i>   |      | 111 |
| 123 | Histone deacetylase 3                                                | <i>HDAC3</i>    |      | 111 |
| 124 | Casein kinase 2 beta                                                 | <i>CSNK2B</i>   |      | 110 |
| 125 | Protein kinase camp-activated catalytic subunit alpha                | <i>PRKACA</i>   |      | 110 |
| 126 | H2A histone family member X                                          | <i>H2AFX</i>    |      | 110 |
| 127 | Vimentin                                                             | <i>VIM</i>      |      | 109 |
| 128 | Heat shock protein family A (Hsp70) member 1B                        | <i>HSPA1B</i>   |      | 108 |



|     |                                                                                                |                    |      |     |
|-----|------------------------------------------------------------------------------------------------|--------------------|------|-----|
| 129 | Heat shock protein family A (Hsp70) member 1A                                                  | <i>HSPA1A</i>      |      | 108 |
| 130 | Cullin 4A                                                                                      | <i>CUL4A</i>       |      | 108 |
| 131 | Sirtuin 1                                                                                      | <i>SIRT1</i>       |      | 107 |
| 132 | Inhibitor of kappa light polypeptide gene enhancer in B-cells, kinase beta                     | <i>IKBKB</i>       |      | 106 |
| 133 | Glyceraldehyde-3-phosphate dehydrogenase                                                       | <i>GAPDH</i>       |      | 105 |
| 134 | IQ motif containing gtpase activating protein 1                                                | <i>IQGAP1</i>      |      | 104 |
| 135 | Conserved helix-loop-helix ubiquitous kinase                                                   | <i>CHUK</i>        |      | 102 |
| 136 | Aurora kinase A                                                                                | <i>AURKA</i>       |      | 102 |
| 137 | Caspase 8                                                                                      | <i>CASP8</i>       |      | 102 |
| 138 | COMMD3-BMI1 readthrough                                                                        | <i>COMMD3-BMI1</i> |      | 100 |
| 139 | Signal transducer and activator of transcription 3                                             | <i>STAT3</i>       |      | 100 |
| 140 | BMI1 proto-oncogene, polycomb ring finger                                                      | <i>BMI1</i>        |      | 100 |
| 141 | Promyelocytic leukemia                                                                         | <i>PML</i>         |      | 100 |
| 142 | Integrin linked kinase                                                                         | <i>ILK</i>         |      | 100 |
| 143 | Synuclein alpha                                                                                | <i>SNCA</i>        |      | 99  |
| 144 | Adrenoceptor beta 2                                                                            | <i>ADRB2</i>       |      | 99  |
| 145 | Phosphoinositide-3-kinase regulatory subunit 1                                                 | <i>PIK3R1</i>      |      | 99  |
| 146 | Heat shock protein family D (Hsp60) member 1                                                   | <i>HSPD1</i>       |      | 99  |
| 147 | X-ray repair complementing defective repair in Chinese hamster cells 5                         | <i>XRCC5</i>       |      | 99  |
| 148 | Neural precursor cell expressed, developmentally down-regulated 4, E3 ubiquitin protein ligase | <i>NEDD4</i>       |      | 98  |
| 149 | Ubiquitin like 4A                                                                              | <i>UBL4A</i>       |      | 98  |
| 150 | Tubulin alpha 1a                                                                               | <i>TUBA1A</i>      |      | 98  |
| 151 | Activating transcription factor 2                                                              | <i>ATF2</i>        |      | 97  |
| 152 | Protein phosphatase 2 regulatory subunit A, alpha                                              | <i>PPP2R1A</i>     |      | 97  |
| 153 | F-box and WD repeat domain containing 11                                                       | <i>FBXW11</i>      |      | 96  |
| 154 | Dual specificity tyrosine phosphorylation regulated kinase 1A                                  | <i>DYRK1A</i>      | TRUE | 96  |
| 155 | Peptidylprolyl cis/trans isomerase, NIMA-interacting 1                                         | <i>PIN1</i>        |      | 96  |
| 156 | Cullin 4B                                                                                      | <i>CUL4B</i>       |      | 96  |

|     |                                                        |                 |    |
|-----|--------------------------------------------------------|-----------------|----|
| 157 | DEAD-box helicase 5                                    | <i>DDX5</i>     | 96 |
| 158 | Actin gamma 1                                          | <i>ACTG1</i>    | 95 |
| 159 | Proteasome 26S subunit, non-atpase 2                   | <i>PSMD2</i>    | 94 |
| 160 | NFKB inhibitor alpha                                   | <i>NFKBIA</i>   | 94 |
| 161 | Caveolin 1                                             | <i>CAV1</i>     | 94 |
| 162 | Paxillin                                               | <i>PXN</i>      | 92 |
| 163 | Nuclear receptor subfamily 3 group C member 1          | <i>NR3C1</i>    | 92 |
| 164 | SET nuclear proto-oncogene                             | <i>SET</i>      | 91 |
| 165 | Ribosomal protein S3                                   | <i>RPS3</i>     | 91 |
| 166 | Spectrin alpha, non-erythrocytic 1                     | <i>SPTAN1</i>   | 91 |
| 167 | Phosphatase and tensin homolog                         | <i>PTEN</i>     | 91 |
| 168 | Proteasome 26S subunit, non-atpase 4                   | <i>PSMD4</i>    | 91 |
| 169 | LYN proto-oncogene, Src family tyrosine kinase         | <i>LYN</i>      | 91 |
| 170 | Huntingtin                                             | <i>HTT</i>      | 91 |
| 171 | Telomeric repeat binding factor 1                      | <i>TERF1</i>    | 91 |
| 172 | Y-box binding protein 1                                | <i>YBX1</i>     | 90 |
| 173 | IQ motif containing B1                                 | <i>IQCB1</i>    | 90 |
| 174 | OTU deubiquitinase, ubiquitin aldehyde binding 1       | <i>OTUB1</i>    | 89 |
| 175 | Ruvb like AAA atpase 2                                 | <i>RUVBL2</i>   | 88 |
| 176 | LIM domain and actin binding 1                         | <i>LIMA1</i>    | 88 |
| 177 | Stratifin                                              | <i>SFN</i>      | 88 |
| 178 | Chaperonin containing TCP1 subunit 2                   | <i>CCT2</i>     | 87 |
| 179 | Ubiquitin C-terminal hydrolase L5                      | <i>UCHL5</i>    | 87 |
| 180 | Protein phosphatase 1 catalytic subunit gamma          | <i>PPP1CC</i>   | 87 |
| 181 | Signal transducer and activator of transcription 1     | <i>STAT1</i>    | 86 |
| 182 | Proteasome 26S subunit, atpase 5                       | <i>PSMC5</i>    | 86 |
| 183 | Heterogeneous nuclear ribonucleoprotein D              | <i>HNRNPD</i>   | 86 |
| 184 | Complement component 1, q subcomponent binding protein | <i>C1QBP</i>    | 85 |
| 185 | Drebrin 1                                              | <i>DBN1</i>     | 85 |
| 186 | COP9 signalosome subunit 6                             | <i>COPS6</i>    | 84 |
| 187 | Histone cluster 2, h4a                                 | <i>HIST2H4A</i> | 84 |
| 188 | Histone cluster 1, h4e                                 | <i>HIST1H4E</i> | 84 |
| 189 | Histone cluster 1, h4b                                 | <i>HIST1H4B</i> | 84 |
| 190 | Histone cluster 1, h4l                                 | <i>HIST1H4L</i> | 84 |
| 191 | Histone cluster 1, h4j                                 | <i>HIST1H4J</i> | 84 |
| 192 | Histone cluster 1, h4k                                 | <i>HIST1H4K</i> | 84 |
| 193 | Histone cluster 1, h4h                                 | <i>HIST1H4H</i> | 84 |

|     |                                                                                         |                 |    |
|-----|-----------------------------------------------------------------------------------------|-----------------|----|
| 194 | Histone cluster 1, h4c                                                                  | <i>HIST1H4C</i> | 84 |
| 195 | Histone cluster 1, h4a                                                                  | <i>HIST1H4A</i> | 84 |
| 196 | Histone cluster 1, h4f                                                                  | <i>HIST1H4F</i> | 84 |
| 197 | Histone cluster 1, h4d                                                                  | <i>HIST1H4D</i> | 84 |
| 198 | Histone cluster 1, h4i                                                                  | <i>HIST1H4I</i> | 84 |
| 199 | Dynein light chain LC8-type 1                                                           | <i>DYNLL1</i>   | 84 |
| 200 | Histone cluster 2, h4b                                                                  | <i>HIST2H4B</i> | 84 |
| 201 | Histone cluster 4, H4                                                                   | <i>HIST4H4</i>  | 84 |
| 202 | Carbamoyl-phosphate synthetase 2, aspartate transcarbamylase, and dihydroorotase        | <i>CAD</i>      | 83 |
| 203 | Ribosomal protein S8                                                                    | <i>RPS8</i>     | 83 |
| 204 | ATP binding cassette subfamily E member 1                                               | <i>ABCE1</i>    | 83 |
| 205 | PAX interacting protein 1                                                               | <i>PAXIP1</i>   | 83 |
| 206 | Small ubiquitin-like modifier 1                                                         | <i>SUMO1</i>    | 83 |
| 207 | Major histocompatibility complex, class I, B                                            | <i>HLA-B</i>    | 83 |
| 208 | Of motor neuron 2, centromeric                                                          | <i>SMN2</i>     | 82 |
| 209 | Survival of motor neuron 1, telomeric                                                   | <i>SMN1</i>     | 82 |
| 210 | Casein kinase 2 alpha 2                                                                 | <i>CSNK2A2</i>  | 82 |
| 211 | Ribosomal protein S3A                                                                   | <i>RPS3A</i>    | 81 |
| 212 | Ribosomal protein S2                                                                    | <i>RPS2</i>     | 81 |
| 213 | BRCA1 associated RING domain 1                                                          | <i>BARD1</i>    | 81 |
| 214 | Protein kinase C delta                                                                  | <i>PRKCD</i>    | 81 |
| 215 | Synaptotagmin binding cytoplasmic RNA interacting protein                               | <i>SYNCRIP</i>  | 81 |
| 216 | Defective in cullin neddylation 1 domain containing 1                                   | <i>DCUN1D1</i>  | 81 |
| 217 | SMAD family member 4                                                                    | <i>SMAD4</i>    | 81 |
| 218 | Ubiquitin B                                                                             | <i>UBB</i>      | 81 |
| 219 | Chaperonin containing TCP1 subunit 3                                                    | <i>CCT3</i>     | 81 |
| 220 | BCL2 associated athanogene 6                                                            | <i>BAG6</i>     | 81 |
| 221 | FBJ murine osteosarcoma viral oncogene homolog                                          | <i>FOS</i>      | 80 |
| 222 | Proteasome subunit alpha 6                                                              | <i>PSMA6</i>    | 79 |
| 223 | Proteasome subunit alpha 2                                                              | <i>PSMA2</i>    | 79 |
| 224 | Ras-related C3 botulinum toxin substrate 1 (rho family, small GTP binding protein Rac1) | <i>RAC1</i>     | 79 |
| 225 | P21 protein (Cdc42/Rac)-activated kinase 1                                              | <i>PAK1</i>     | 79 |
| 226 | Dnaj heat shock protein family (Hsp40) member A1                                        | <i>DNAJA1</i>   | 79 |

|     |                                                                         |                |    |
|-----|-------------------------------------------------------------------------|----------------|----|
| 227 | Tumor protein p53 binding protein 1                                     | <i>TP53BP1</i> | 79 |
| 228 | Histone deacetylase 4                                                   | <i>HDAC4</i>   | 78 |
| 229 | Nuclear receptor coactivator 3                                          | <i>NCOA3</i>   | 78 |
| 230 | Mitogen-activated protein kinase kinase<br>kinase 14                    | <i>MAP3K14</i> | 78 |
| 231 | Ribosomal protein S14                                                   | <i>RPS14</i>   | 77 |
| 232 | Microtubule associated protein RP/EB<br>family member 1                 | <i>MAPRE1</i>  | 77 |
| 233 | Growth arrest and DNA damage inducible<br>alpha                         | <i>GADD45A</i> | 77 |
| 234 | Splicing factor proline/glutamine-rich                                  | <i>SFPQ</i>    | 76 |
| 235 | Proteasome 26S subunit, non-atpase 1                                    | <i>PSMD1</i>   | 76 |
| 236 | KH domain containing, RNA binding,<br>signal transduction associated 1  | <i>KHDRBS1</i> | 76 |
| 237 | P21 protein (Cdc42/Rac)-activated kinase<br>2                           | <i>PAK2</i>    | 76 |
| 238 | Aurora kinase B                                                         | <i>AURKB</i>   | 76 |
| 239 | Karyopherin subunit beta 1                                              | <i>KPNB1</i>   | 76 |
| 240 | Nuclear factor of kappa light polypeptide<br>gene enhancer in B-cells 2 | <i>NFKB2</i>   | 75 |
| 241 | TANK binding kinase 1                                                   | <i>TBK1</i>    | 75 |
| 242 | Tubulin alpha 4a                                                        | <i>TUBA4A</i>  | 75 |
| 243 | Eukaryotic translation elongation factor 2                              | <i>EEF2</i>    | 74 |
| 244 | S-phase kinase-associated protein 1                                     | <i>SKP1</i>    | 74 |
| 245 | Chaperonin containing TCP1 subunit 6A                                   | <i>CCT6A</i>   | 74 |

---
